# Supplementary material for: Adherence to the 2015–2020 Dietary Guidelines for Americans Compared with the Mediterranean Diet in Relation to Risk of Prediabetes: Results from NHANES 2007–2016
Source: MDPI journal article supplement (doi:10.3390/nu15163546), 2023-08-11
Supplement: s1 [file s1]

**Table S2.** aMED index components and criteria for scoring.

| Food Groups                    | Criteria for minimum score of 0                       | Criteria for maximum score of 1               |
|--------------------------------|-------------------------------------------------------|-----------------------------------------------|
| Whole Fruit                    | < Median                                              | ≥ Median                                      |
| Vegetables                     | < Median                                              | ≥ Median                                      |
| Whole grain products           | < Median                                              | ≥ Median                                      |
| Legumes                        | < Median                                              | ≥ Median                                      |
| Nuts                           | < Median                                              | ≥ Median                                      |
| Fish                           | < Median                                              | ≥ Median                                      |
| Red and processed meat         | ≥ Median                                              | < Median                                      |
| Ratio of monosat to sat lipids | < Median                                              | ≥ Median                                      |
| Alcohol                        | < 5 or >15 g/d for female;<br>< 5 or >25 g/d for male | 5-15 g/day for female;<br>5-25 g/day for male |
| Total                          | 0                                                     | 9                                             |

aMED, alternate Mediterranean diet;
