# Supplementary material for: Adherence to the 2015–2020 Dietary Guidelines for Americans Compared with the Mediterranean Diet in Relation to Risk of Prediabetes: Results from NHANES 2007–2016
Source: MDPI journal article supplement (doi:10.3390/nu15163546), 2023-08-11
Supplement: s1 [file s1]

**Table S5.** Associations between diet quality scores and risk of prediabetes among US adults after excluding participants with missing covariates in NHANES 2007–2016.

|                      | T1                   | T2                    | T3                    | P <sub>trend</sub> |
|----------------------|----------------------|-----------------------|-----------------------|--------------------|
| <b>HEI-2015</b>      |                      |                       |                       |                    |
| Median score (range) | 37.450(9.500-44.323) | 50.681(44.324-56.943) | 65.100(56.944-95.997) |                    |
| Model1               | 1                    | 0.83(0.73,0.94)       | 0.71(0.62,0.81)       | <0.001             |
| Model2               | 1                    | 0.84(0.74,0.95)       | 0.73(0.63,0.83)       | <0.001             |
| Model3               | 1                    | 0.89(0.78,1.01)       | 0.81(0.71,0.93)       | 0.003              |
| <b>aMED index</b>    |                      |                       |                       |                    |
| Median score (range) | 2(0-2)               | 3(3-4)                | 5(5-9)                |                    |
| Model1               | 1                    | 0.92(0.83,1.03)       | 0.74(0.65,0.85)       | <0.001             |
| Model2               | 1                    | 0.94(0.84,1.04)       | 0.76(0.67,0.87)       | <0.001             |
| Model3               | 1                    | 0.99(0.89,1.10)       | 0.86(0.75,0.99)       | 0.02               |

Model 1 was adjusted for age (years), sex (female, male), race (Non-Hispanic White, Non-Hispanic Black, Mexican American, other race), education (less than high school, high school or equivalent, college or above), marital status (married, previously married, never married), PIR ( $\leq 1.0$ ,  $>1.0$ - $3.0$ ,  $>3.0$ ), and total energy intake (kcal/d). Model 2 was adjusted for covariates in the model 1 plus smoking status (never, former, current), drinking status (never, former, non-excessive, excessive, only for HEI-2015), and physical activity (low, moderate, high). Model 3 was adjusted for covariates in the model 2 and was additionally adjusted for body mass index. HEI, Healthy Eating Index; aMED, alternate Mediterranean diet; Odds ratio (OR) and 95% confidence interval (95% CI) were estimated using multivariable logistic regression models taking into account the complex sampling design; P for trend values were calculated by assigning the median value to each tertile of diet quality score as a continuous variable.
