# Supplementary material for: Adherence to the 2015–2020 Dietary Guidelines for Americans Compared with the Mediterranean Diet in Relation to Risk of Prediabetes: Results from NHANES 2007–2016
Source: MDPI journal article supplement (doi:10.3390/nu15163546), 2023-08-11
Supplement: s1 [file s1]

**Table S4.** Associations between diet quality scores and risk of prediabetes among US adults with further adjustment of self-reported hyperlipidemia and self-reported hypertension in NHANES 2007–2016.

|                                     | T1                   | T2                    | T3                    | P <sub>trend</sub> |
|-------------------------------------|----------------------|-----------------------|-----------------------|--------------------|
| <b>HEI-2015</b>                     |                      |                       |                       |                    |
| Median score (range)                | 37.450(9.500-44.542) | 50.681(44.543-57.217) | 65.100(57.218-95.997) |                    |
| Model3                              | 1                    | 0.87(0.78,0.98)       | 0.82(0.72,0.94)       | 0.005              |
| Model3+self-reported hyperlipidemia | 1                    | 0.87(0.78,0.98)       | 0.82(0.72,0.94)       | 0.005              |
| Model3+self-reported hypertension   | 1                    | 0.88(0.78,0.98)       | 0.83(0.72,0.94)       | 0.006              |
| <b>aMed index</b>                   |                      |                       |                       |                    |
| Median score (range)                | 2(0-2)               | 3(3-4)                | 5(5-9)                |                    |
| Model3                              | 1                    | 0.99(0.90,1.10)       | 0.87(0.76,0.98)       | 0.02               |
| Model3+self-reported hyperlipidemia | 1                    | 0.99(0.90,1.10)       | 0.87(0.76,0.99)       | 0.02               |
| Model3+self-reported hypertension   | 1                    | 0.99(0.90,1.10)       | 0.86(0.76,0.98)       | 0.02               |

Model 3 was adjusted for age (years), sex(female, male), race (Non-Hispanic White, Non-Hispanic Black, Mexican American, other race), education (less than high school, high school or equivalent, college or above), marital status (married, previously married ,never married), PIR ( $\leq 1.0$ ,  $>1.0$ -3.0, $>3.0$ ), total energy intake (kcal/d), smoking status (never, former, current), drinking status (never, former, non-excessive, excessive, only for HEI-2015), physical activity (low, moderate, high), body mass index. HEI, Healthy Eating Index; aMED, alternate Mediterranean diet; Odds ratio (OR) and 95% confidence interval (95% CI) were estimated using multivariable logistic regression models taking into account the complex sampling design; P for trend values were calculated by assigning the median value to each tertile of diet quality score as a continuous variable.
