# Supplementary material for: Adherence to the 2015–2020 Dietary Guidelines for Americans Compared with the Mediterranean Diet in Relation to Risk of Prediabetes: Results from NHANES 2007–2016
Source: MDPI journal article supplement (doi:10.3390/nu15163546), 2023-08-11
Supplement: s1 [file s1]

**Table S3.** Associations between diet quality scores and risk of prediabetes among US adults after excluding participants with extreme energy intake (>6000 kcal/d or <800 kcal/d for men, >4000 kcal/d or <600 kcal/d for women) in NHANES 2007–2016.

|                      | T1                   | T2                    | T3                    | P <sub>trend</sub> |
|----------------------|----------------------|-----------------------|-----------------------|--------------------|
| <b>HEI-2015</b>      |                      |                       |                       |                    |
| Median score (range) | 37.450(9.500-44.542) | 50.681(44.543-57.217) | 65.100(57.218-95.997) |                    |
| Model1               | 1                    | 0.81(0.72,0.90)       | 0.72(0.63,0.83)       | <0.001             |
| Model2               | 1                    | 0.82(0.73,0.92)       | 0.74(0.65,0.85)       | <0.001             |
| Model3               | 1                    | 0.87(0.77,0.97)       | 0.83(0.72,0.95)       | 0.01               |
| <b>aMed index</b>    |                      |                       |                       |                    |
| Median score (range) | 2(0-2)               | 3(3-4)                | 5(5-9)                |                    |
| Model1               | 1                    | 0.94(0.85,1.04)       | 0.75(0.66,0.84)       | <0.001             |
| Model2               | 1                    | 0.96(0.86,1.06)       | 0.77(0.68,0.87)       | <0.001             |
| Model3               | 1                    | 1.01(0.91,1.12)       | 0.87(0.76,0.99)       | 0.02               |

Model 1 was adjusted for age (years), sex(female, male), race (Non-Hispanic White, Non-Hispanic Black, Mexican American, other race), education (less than high school, high school or equivalent, college or above), marital status (married, previously married ,never married), PIR ( $\leq 1.0$ ,  $>1.0$ - $3.0$ ,  $>3.0$ ), and total energy intake (kcal/d). Model 2 was adjusted for covariates in the model 1 plus smoking status (never, former, current), drinking status (never, former, non-excessive, excessive, only for HEI-2015), and physical activity (low, moderate, high). Model 3 was adjusted for covariates in the model 2 and was additionally adjusted for body mass index (kg/m<sup>2</sup>). HEI, Healthy Eating Index; aMED, alternate Mediterranean diet; Odds ratio (OR) and 95% confidence interval (95% CI) were estimated using multivariable logistic regression models taking into account the complex sampling design; P for trend values were calculated by assigning the median value to each tertile of diet quality score as a continuous variable.
