# Supplementary figures and images for: Adherence to the 2015–2020 Dietary Guidelines for Americans Compared with the Mediterranean Diet in Relation to Risk of Prediabetes: Results from NHANES 2007–2016
Source: MDPI journal article supplement (doi:10.3390/nu15163546), 2023-08-11

**Figure S1.** Flowchart of the study participants.

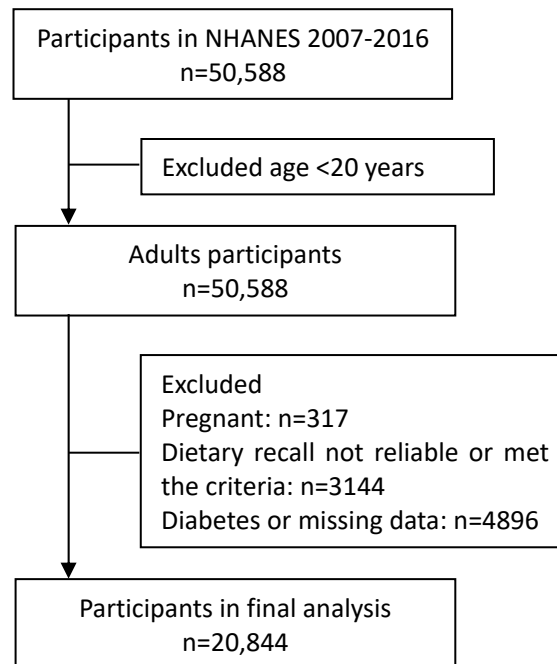

Supplement: s1 [file s1]
